# Supplementary material for: Loss of Nckx3 Exacerbates Experimental DSS-Induced Colitis in Mice through p53/NF-κB Pathway
Source: PubMed Central journal article supplement (PMC7961925; doi:10.3390/ijms22052645), 2021-03-05
Supplement: ijms-22-02645-s001.pdf [file ijms-22-02645-s001.pdf]

**Supplementary Table S1.** Primers used for gene expression analysis through Real-Time PCR.

|               | Forward               | Reverse                |
|---------------|-----------------------|------------------------|
| <i>Ifit1</i>  | GGCCGTTTCCTACAGTTTCA  | AGCCCAAGAAGGCTGGTACT   |
| <i>Zbp1</i>   | TGACGACAGCCAAAGAAGTG  | TGTGGGTTCAAGACCAGCTT   |
| <i>Irf7</i>   | CCCAAGGAGAAGACCCTGAT  | CCAGGTCCATGAGGAAGTGT   |
| <i>Oasl1</i>  | ATTGCACGCTCGCCTACTAC  | AGGCCCTGCCTGTCTTCTAT   |
| <i>Oasl2</i>  | ACAGCCCCATCAGAAAGATG  | GGAAAGGTCTCCAGCACTTG   |
| <i>Erdr1</i>  | ACAGTGATGTCACCCACGAA  | GGCATTCTGTACGCAGTCA    |
| <i>Stat1</i>  | GTGGAGCCCTACACGAAAAA  | TCTGGTGCTTCCTTTGGTCT   |
| <i>Irgm2</i>  | CGCGATAGAGATTCGGAAAG  | GGGTTCCAGTGCGATAACAAC  |
| <i>Anpep</i>  | GTGAACGAAGCGGACAAACT  | GGACAAAGTCCCAAACCAGA   |
| <i>Rtp4</i>   | CAAAGAGTTCCTCCCCATCA  | GGCAAATGCAGCAATAGACA   |
| <i>Isg15</i>  | GGCCACAGCAACATCTATGA  | CGCAAATGCTTGATCACTGT   |
| <i>Usp18</i>  | GATTCTCTGCCAGGAACTCG  | ATGACCAAAGTCAGCCATCC   |
| <i>Dnase1</i> | TGCAGCCTTCAACATTCGGA  | GGTGTGAGGTTTGTCCCGAT   |
| <i>Gkn1</i>   | CCTGGTTTTGCTTACACGGTC | GGAGTCCCAGCCGTTATTGT   |
| <i>Gkn2</i>   | ACTGGTTCCTGTTTGGGTCG  | GCTCCAGTGCTCACCTCTTT   |
| <i>Gkn3</i>   | TACCCAGCCGAATCAAAAAC  | AGGGATCTCACCACAAATGG   |
| <i>Tff1</i>   | CAGGCCCAGGAAGAAACAT   | TCTTCTTGAGTGTTCTCGATGG |
| <i>Tff2</i>   | GTTTCCACCCACTTCCAAAC  | CAGACTGTGGGAAGAAACACC  |
| <i>Grem1</i>  | TTCTGTTATGGCCAGTGCAA  | GCGTGTGACCCTTTTCTTCT   |
| <i>Anxa10</i> | TGGATGCCATCAATGACTGT  | TTTCACTTCTGGCGATGAGA   |
| <i>Acta2</i>  | AGCCATCTTTCATTGGGATG  | AGGGCTGTGATCTCCTTCTG   |
| <i>Agr2</i>   | AAGCACCTTCTCCTGATGG   | GCAGCTTGAGAGCTTCTTCA   |
| <i>Clu</i>    | CGAAGATGCTCAACACCTCA  | AACAGCTTCACCACCACCTC   |
| <i>Reg3g</i>  | CAACAGAGGTGGATGGGAGT  | GGCCTTGAATTTGCAGACAT   |
| <i>Fxyd3</i>  | GGGCTCATTTGTGCAGGGAT  | AGCTGAGCCTGGTGTGATGA   |

---

|               |                        |                        |
|---------------|------------------------|------------------------|
| <i>Mt2</i>    | GCCTGCAAATGCAAACAATG   | CACTTGTCGGAAGCCTCTTT   |
| <i>Muc5ac</i> | CTGCTTCTGTCCTGAGGGTATG | CATGTGTTGGTGCAGTCAGTAG |
| <i>Muc6</i>   | GCCAACCAAGTGTACCAGGA   | ATCAAGCAGTGTACCGTGGG   |
| <i>TNF</i>    | CCTGTAGCCCACGTCGTAG    | GGGAGTAGACAAGGTACAACCC |
| <i>IFN-a</i>  | TGCAGGAATTTCCCCTGACC   | AAGACAGGGCTCTCCAGACT   |
| <i>IFN-b</i>  | AACTCCACCAGCAGACAGTG   | CATCCAGGCGTAGCTGTTGT   |
| <i>IL-1a</i>  | TCGGGAGGAGACGACTCTAAAT | GTTTCTGGCAACTCCTTCAGC  |
| <i>IL-1b</i>  | TGCCACCTTTTGACAGTGATG  | TGATACTGCCTGCCTGAAGC   |
| <i>IL-6</i>   | GTTCTCTCTGCAAGAGACTTC  | TGGGAGTGGTATCCTCTGTG   |
| <i>p53</i>    | TGGAGGAGTCACAGTCGGAT   | CAGTGAGGTGATGGCAGGAT   |
| <i>p65</i>    | CTGCCGAGTAAACCGGAACT   | GCCTGGTCCCGTGAAATACA   |

---
